# Supplementary material for: Functional Profiling of Unfamiliar Microbial Communities Using a Validated De Novo Assembly Metatranscriptome Pipeline
Source: PubMed Central journal article supplement (PMC4710500; doi:10.1371/journal.pone.0146423), 2016-01-12
Supplement: pone.0146423.s005.pdf [file pone.0146423.s005.pdf]

# Erysipelotrichaceae

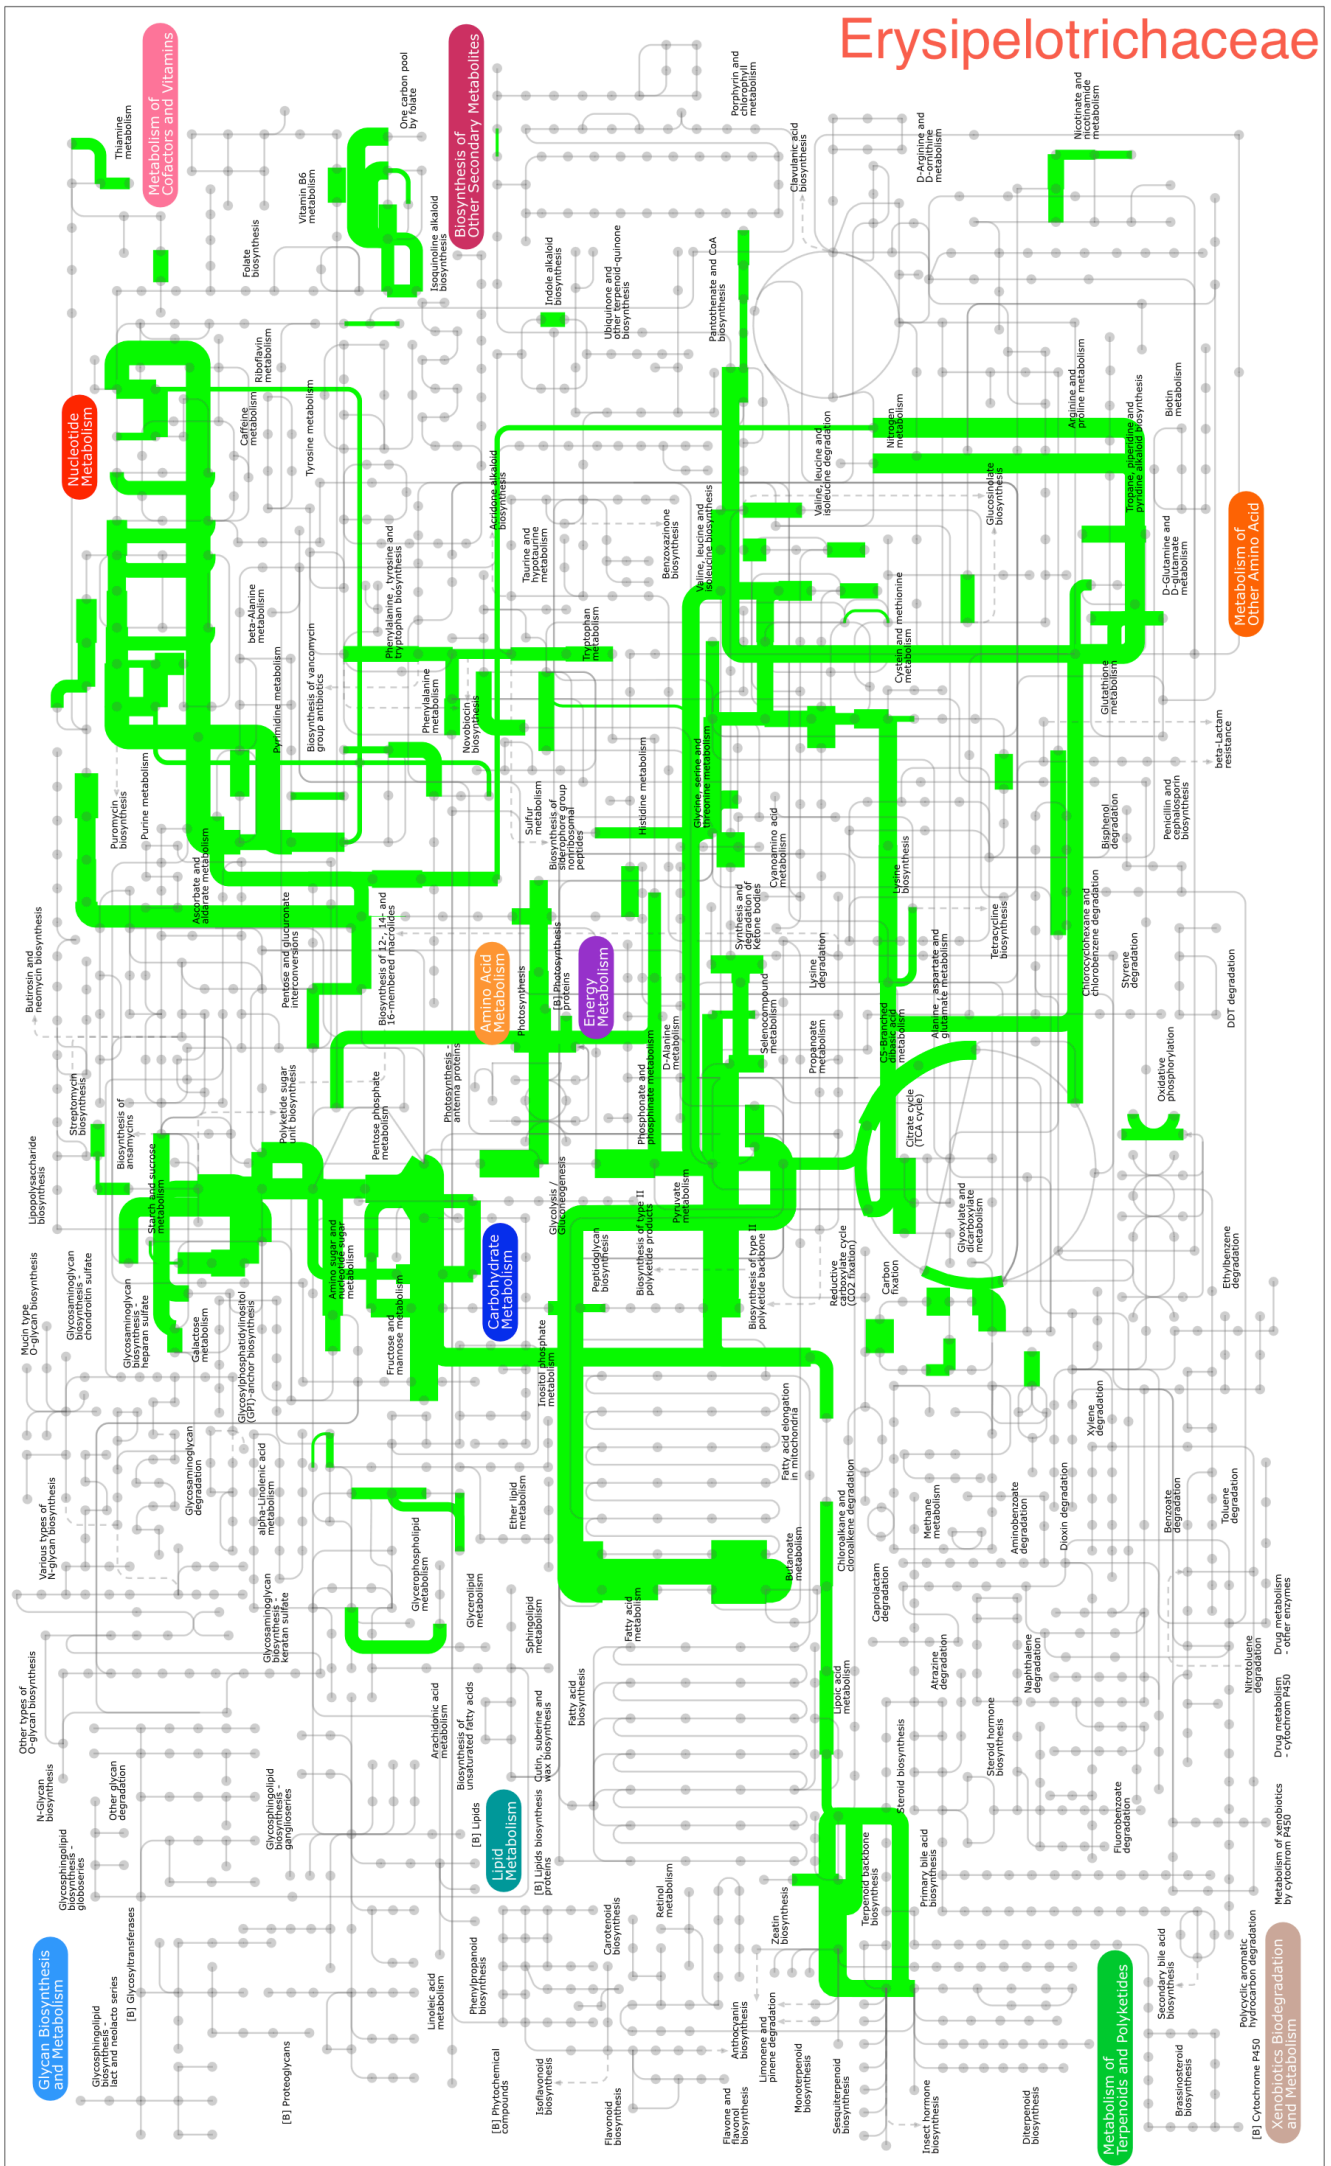

**Glycan Biosynthesis and Metabolism**

**Carbohydrate Metabolism**

**Amino Acid Metabolism**

**Energy Metabolism**

**Nucleotide Metabolism**

**Biosynthesis of Other Secondary Metabolites**

**Metabolism of Terpenoids and Polyketides**

**Metabolism of Other Amino Acid**

**Xenobiotics Biodegradation and Metabolism**
